# Supplementary material for: TPXL-1 activates Aurora A to clear contractile ring components from the polar cortex during cytokinesis
Source: PubMed Central journal article supplement — J Cell Biol. 2018 Mar 5;217(3):837–48. doi: 10.1083/jcb.201706021 (PMC5839786; doi:10.1083/jcb.201706021), 2018-03-05
Supplement: JCB_201706021_sm.pdf [file JCB_201706021_sm.pdf]

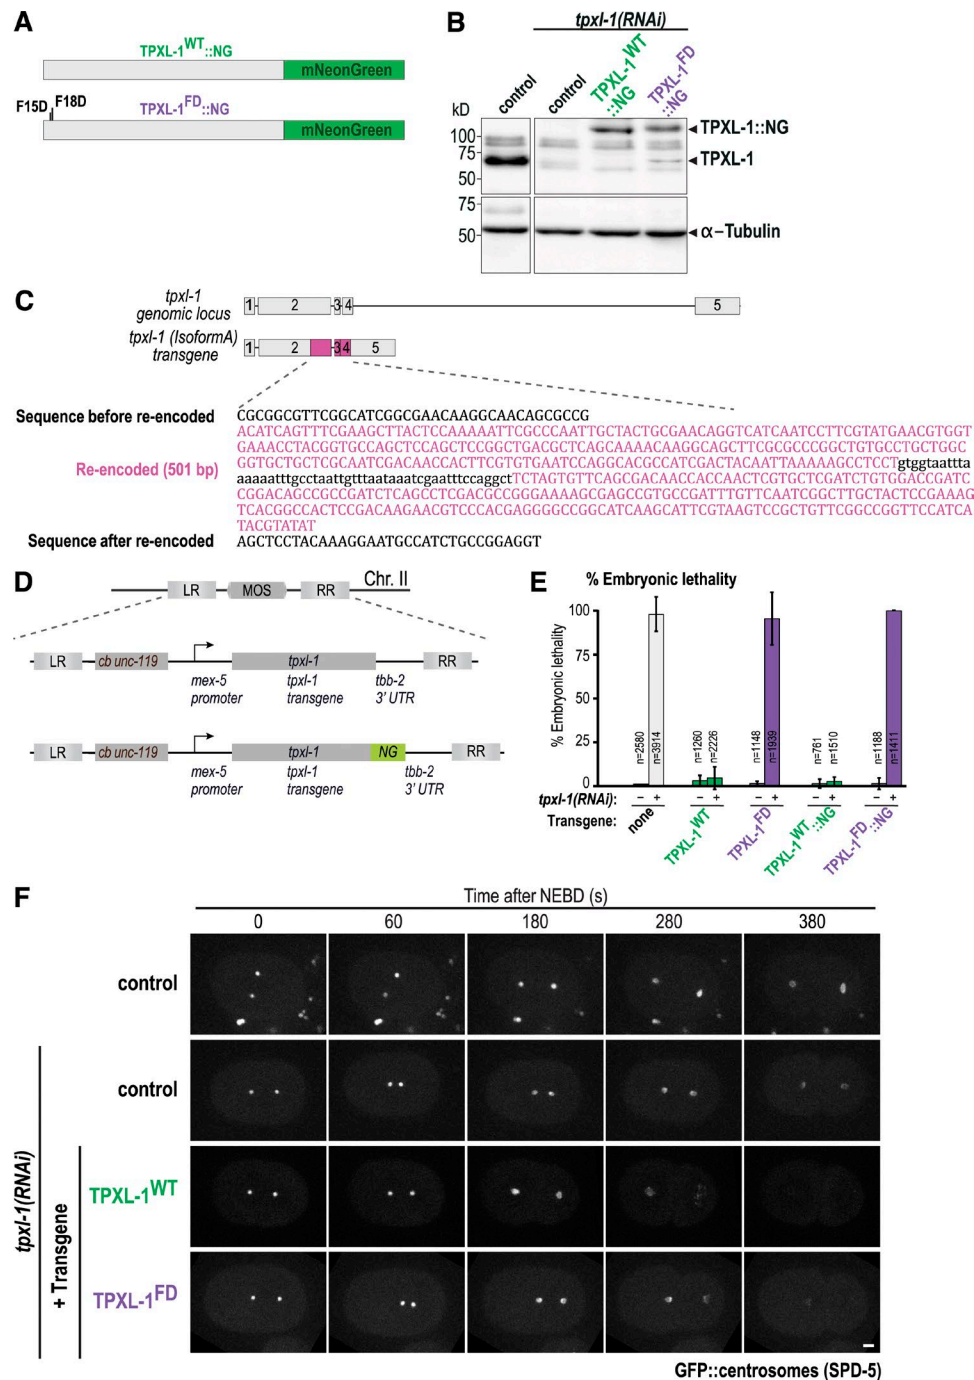

Figure S1. **Transgenes encoding WT untagged and mNeonGreen tagged TPXL-1 are functional.** Related to Figs. 4 and 5. **(A)** Schematics showing TPXL-1<sup>WT</sup> or TPXL-1<sup>FD</sup> tagged with mNeonGreen. **(B)** Immunoblots of control (N2) and transgenic animals expressing RNAi-resistant TPXL-1<sup>WT</sup>::NG or TPXL-1<sup>FD</sup>::NG after depletion of endogenous TPXL-1 by RNAi. Immunoblots were probed for TPXL-1 and α-tubulin as a loading control. **(C)** Schematic representation of intron-exon organization of the *C. elegans tpxl-1* gene. To make the *tpxl-1* transgene RNAi resistant, a region including exon 3 and parts of exons 2 and 4 was reencoded. The intron between exons 2 and 3 was maintained, but the long intron between exons 4 and 5 was deleted. **(D)** The untagged and NG-tagged TPXL-1 transgenes, under control of the *mex-5* promoter and *tbb-2* 3' UTR, were integrated into chromosome II using MosSCI (Frøkjær-Jensen et al., 2008). **(E)** Graph plotting percentage embryonic lethality for the indicated conditions. Error bars are SD; *n* = number of progeny analyzed. **(F)** Maximum-intensity projections of five confocal planes (1.5 μm apart) of embryos expressing GFP::SPD-5 with TPXL-1<sup>WT</sup> or TPXL-1<sup>FD</sup> or without a transgene (control). Endogenous TPXL-1 was depleted by RNAi. The distance between the two centrosomes was measured and is quantified in Fig. 5 C. Time after NEBD is indicated. Bar, 5 μm.

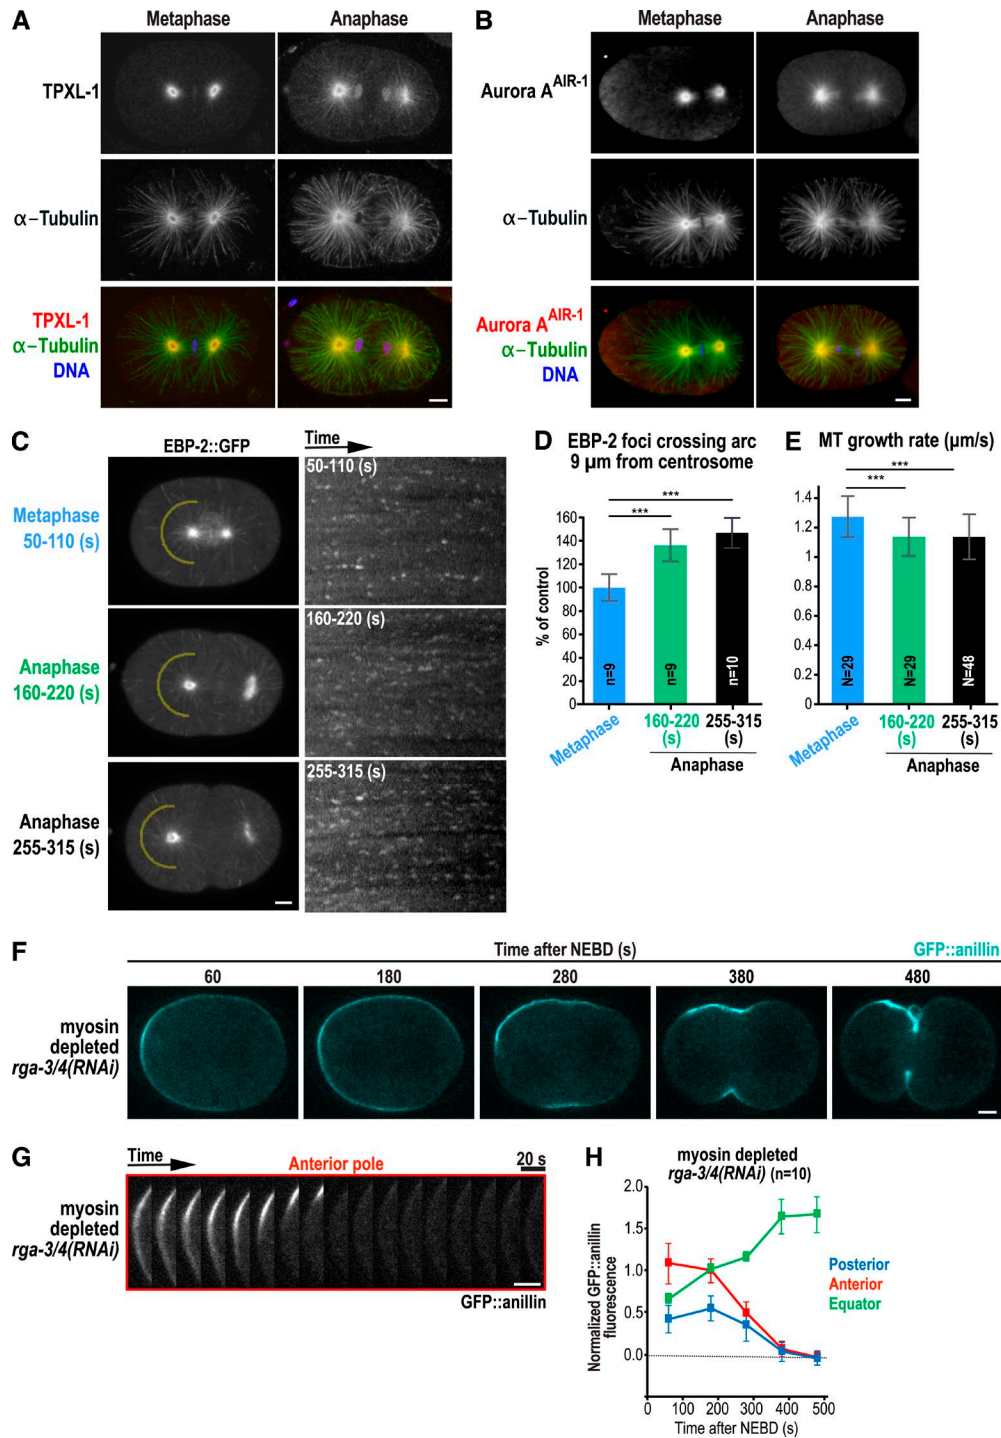

Figure S2. **Endogenous TPXL-1 and Aurora A<sup>AIR-1</sup> localize to astral microtubules in anaphase.** Related to Fig. 4. **(A)** Confocal images of fixed metaphase and anaphase embryos stained for endogenous TPXL-1,  $\alpha$ -tubulin, and DNA (prometaphase and metaphase,  $n = 8$ ; anaphase,  $n = 9$  embryos). To visualize astral microtubules without saturating the aster centers, a gamma of 2 was introduced in Photoshop for all images, which were scaled identically. **(B)** Confocal images of fixed metaphase ( $n = 5$ ) and anaphase ( $n = 5$ ) embryos stained for Aurora A<sup>AIR-1</sup>,  $\alpha$ -tubulin, and DNA. To visualize astral microtubules without saturating the aster centers, a gamma of 1.5 was applied to all images in Photoshop, which were scaled identically. **(C)** Representative projections of the images acquired every 400 ms over a 4-s interval in metaphase ( $n = 9$ ), early anaphase (160–220 s after NEBD;  $n = 9$ ), and late anaphase (255–315 s after NEBD;  $n = 10$ ) control embryos expressing EBP-2::GFP. To visualize EBP-2::GFP without saturating the aster centers, a gamma of 1.2 was introduced in Photoshop. Kymographs generated for the indicated conditions (right) were used to count the number of EBP-2::GFP foci that crossed an arc 9  $\mu$ m away from the anterior centrosome (yellow). **(D and E)** Graphs plot the number of EBP-2::GFP foci crossing an arc 9  $\mu$ m from the centrosome (D) and the microtubule growth rates (E) at the indicated times in control embryos. Error bars are SD; p-values are two-tailed Student's *t* test (\*\*\*,  $P < 0.001$ );  $n$  = number of embryos in D;  $N$  = number of microtubules tracked in three or more embryos per condition in E. **(F)** Representative time-lapse images of the first division of a myosin-depleted *rga-3/4(RNAi)* embryo expressing GFP::anillin (cyan,  $n = 5$  embryos). Time points are seconds after NEBD. **(G)** Kymograph of the anterior pole of the embryo in F beginning 180 s after NEBD. **(H)** Normalized cortical GFP::anillin fluorescence was quantified as depicted in Fig. 1 F and is plotted for the anterior (red), posterior (blue) and equatorial (green) cortex in myosin-depleted *rga-3/4(RNAi)* embryos. Error bars are SEM and  $n$  = number of linescans. Bars, 5  $\mu$ m.

Video 1. *C. elegans* one-cell embryos expressing GFP::anillin (cyan) and mCherry::histone (red) without (control, left) and with (right) myosin depletion. Related to Fig. 1. Images were acquired every 20 s on an UltraVIEW VoX spinning disk confocal microscope (PerkinElmer) attached to an Axio Observer D1 stand (Zeiss), equipped with a 63x 1.4-NA Plan-Apochromat oil immersion objective and a EMCCD C9100-50 camera (1,000 x 1,000 pixels). Video starts 60 s after NEBD. Playback rate is 60x real time (3 frames/s).

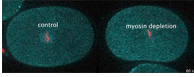

Video 2. Two representative myosin-depleted *rga-3/4Δ* embryos expressing GFP::anillin (cyan) and mCherry::histone (red). Related to Fig. 1. Images were acquired as described in Video 1 every 20 s. Video starts 60 s after NEBD. Playback rate is 60x real time (3 frames/second).

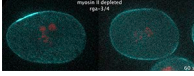

Video 3. Myosin-depleted *rga-3/4Δ* *C. elegans* embryos without (left) and with *hcp-4(RNAi)* (right) expressing GFP::anillin and a GFP-tagged centrosome marker (cyan) along with mCherry::histone (red). Related to Fig. 2. Images were acquired as described in Video 1 every 20 s. Playback rate is 60x real time (3 frames/s). Video starts 180 s after NEBD.

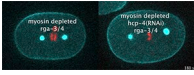

Video 4. Myosin-depleted *rga-3/4Δ* *C. elegans* embryos expressing GFP::anillin and a GFP-tagged centrosome marker (cyan) along with mCherry::histone (red). Related to Fig. 3. TPXL-1 (left) or TPXL-1 and HCP-4 (right) were additionally depleted by RNAi. Images were acquired as described in Video 1 every 20 s. Playback rate is 60x real time (3 frames/s). Video starts 180 s after NEBD.

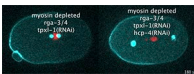

Video 5. Myosin-depleted *rga-3/4Δ* *C. elegans* embryos expressing LifeAct::mKate2. Related to Fig. 3. HCP-4 (left) or HCP-4 and TPXL-1 (right) were additionally depleted by RNAi. Images were acquired every 20 s on a Nikon eclipse Ti spinning disk confocal controlled by NIS Elements 4.51 software equipped with a 100x 1.45-NA Plan-Apochromat oil immersion objective and Andor DU-888 X11056 camera. Elapsed time and anaphase onset are indicated. Playback rate is 60x real time (3 frames/s). Video starts 80 s after NEBD.

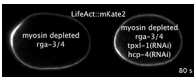

Video 6. Representative examples of *C. elegans* embryos expressing TPXL-1<sup>WT</sup>::NG (left) or TPXL-1<sup>FD</sup>::NG (right) from RNAi-resistant transgenes after depletion of endogenous TPXL-1 by RNAi. Related to Fig. 4. Images were acquired as described in Video 5. To visualize TPXL-1 localization on astral microtubules without saturating the astral centers, a gamma of 0.5 was introduced in Fiji. Elapsed time and anaphase onset are indicated.

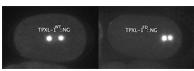

Video 7. *C. elegans* one-cell control (left), myosin-depleted *rga-3/4(RNAi)* (middle), or myosin-depleted *hcp-4 tpxl-1(RNAi)* (right) embryos expressing EBP-2::GFP. Related to Fig. 4. Images were acquired as described in Video 5 every 400 ms. Playback rate is 2.4x real time (6 frames/s). To visualize EBP-2::GFP without saturating the aster centers, a gamma of 0.7 was introduced in Fiji. Movie starts 255 s after NEBD.

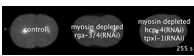

Video 8. Representative examples of *C. elegans* embryos expressing GFP::Aurora A<sup>AIR-1</sup> without (left) and with *tpxl-1(RNAi)* (right). Related to Fig. 4. Images were acquired as described in Video 5. To visualize GFP::Aurora A<sup>AIR-1</sup> localization on astral microtubules without saturating the aster centers, a gamma of 0.6 was introduced in Fiji. Elapsed time and anaphase onset are indicated.

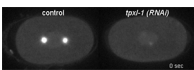

Video 9. Representative myosin-depleted *rga-3/4Δ* *C. elegans* embryos expressing TPXL-1<sup>WT</sup> (left) or TPXL-1<sup>FD</sup> (right) together with mKate2::anillin. Related to Fig. 5. Embryos were additionally depleted of endogenous TPXL-1 and HCP-4 by RNAi. Images were acquired as described in Video 1 every 20 s. Playback rate is 60x real time (3 frames/s). Video starts 180 s after NEBD.

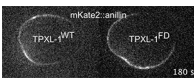

Table S1. *C. elegans* strains

| Strain name | Genotype                                                                                                                                                                                                                                                      | Reference                   |
|-------------|---------------------------------------------------------------------------------------------------------------------------------------------------------------------------------------------------------------------------------------------------------------|-----------------------------|
| N2          | Wild type (ancestral)                                                                                                                                                                                                                                         |                             |
| OD184       | lts108 [pOD564/pFM005; pie-1::LAP::AIR-1 <sup>WT</sup> reencoded; unc-119(+)]                                                                                                                                                                                 | This study                  |
| OD296       | lts37 [pAA64; pie-1/mCherry::his-58; unc-119 (+) IV; lts28 [pASM14; pie-1/GFP-TEV- Stag::ANI-1; unc-119 (+)];                                                                                                                                                 | Zanin et al., 2013          |
| OD314       | unc-119(ed3) III; lts37 [pAA64; pie-1/mCherry::his-58; unc-119 (+) IV; lts28 [pASM14; pie-1/GFP-TEV- Stag::ANI-1; unc-119 (+); rga-4(ok1935) unc-62(e644) rga-3(ok1988) V/nT1[qls51] (IV;V)                                                                   | Zanin et al., 2013          |
| OD847       | unc-119(ed9) III; ltsi202 [pVV103/ pOD1021; Pspd-2::GFP::SPD-5 RNAi- resistant; cb-unc-119(+)]II                                                                                                                                                              | Woodruff et al., 2015       |
| OD1359      | unc-119(ed3)III; ltsi716 [pOD1935/pDC208; Pmex-5::EBP-2::GFP::tbb-2; cb-unc-119(+)]I                                                                                                                                                                          | Wang et al., 2015           |
| OD1959      | unc-119(ed9) III; ltsi654 [pVV103; Pspd-2::GFP::SPD-5 reencoded; cb-unc-119(+)]I                                                                                                                                                                              | Wueseke et al., 2016        |
| OD2879      | gsp-2(lt27 [GFP::gsp-2]) unc-119(ed3) III?; lts37 [pAA64; pie-1/mCherry::his-58; unc-119 (+) IV                                                                                                                                                               | Hattersley et al., 2016     |
| OD3421      | unc-119(ed3)III?; lts37 [pAA64; pie-1/mCherry::his-58; unc-119 (+) IV;gsp-1(lt94 [gfp::gsp-1])V                                                                                                                                                               | Kim et al., 2017            |
| EG6699      | ttTi5605 II; unc-119(ed3) III; oxEx1578                                                                                                                                                                                                                       | Frøkjær-Jensen et al., 2008 |
| EG8081      | unc-119(ed3) III; oxTi177 IV.                                                                                                                                                                                                                                 | Frøkjær-Jensen et al., 2008 |
| ZAN43       | ltsi202 [pVV103/pOD1021; Pspd-2::GFP::SPD-5 RNAi-resistant; cb-unc-119(+)]II; lts37 [pAA64; pie-1/mCherry::his-58; unc-119 (+) IV; lts28 [pASM14; pie-1/GFP-TEV- Stag::ANI-1; unc-119 (+);rga-4(ok1935) unc-62(e644) rga-3(ok1988) V/nT1[qls51] (IV;V)        | This study                  |
| ZAN57       | ltsi654 [pVV103; Pspd-2::GFP::SPD-5 reencoded; cb-unc-119(+)]I; estSi24 [pEZ145; pmex-5::TPXL-1 <sup>WT</sup> ::tbb-2; cb-unc-119(+)]II                                                                                                                       | This study                  |
| ZAN59       | estSi31 [pEZ150; pmex-5::TPXL-1 <sup>FD</sup> ::tbb-2; cb-unc-119(+)]II; unc-119(ed3) III                                                                                                                                                                     | This study                  |
| ZAN103      | unc-119(ed3) III; estSi57 [pEZ152; pani-1::mKate2::ANI-1; cb-unc-119(+)]IV                                                                                                                                                                                    | This study                  |
| ZAN163      | ltsi654 [pVV103; Pspd-2::GFP::SPD-5 reencoded; cb-unc-119(+)]I; estSi31 [pEZ150; pmex-5::TPXL-1 <sup>FD</sup> ::tbb-2; cb-unc-119(+)]II                                                                                                                       | This study                  |
| ZAN181      | estSi121 [pEZ185; pmex-5::TPXL-1 <sup>WT</sup> ::mNeonGreen:: tbb-2; cb-unc-119(+)]II; unc-119(ed3) III                                                                                                                                                       | This study                  |
| ZAN248      | ltsi654 [pVV103; Pspd-2::GFP::SPD-5 reencoded; cb-unc-119(+)]I; estSi31 [pEZ150; pmex-5::TPXL-1 <sup>FD</sup> ::tbb-2; cb-unc-119(+)]II; rga-4(ok1935) unc-62(e644) rga-3(ok1988) V/nT1[qls51](IV;V) estSi57 [pEZ152; pani-1::mKate2::ANI-1; cb-unc-119(+)]IV | This study                  |
| ZAN249      | ltsi654 [pVV103; Pspd-2::GFP::SPD-5 reencoded; cb-unc-119(+)]I; estSi24 [pEZ145; pmex-5::TPXL-1 <sup>WT</sup> ::tbb-2; cb-unc-119(+)]II; rga-4(ok1935) unc-62(e644) rga-3(ok1988) V/nT1[qls51](IV;V) estSi57 [pEZ152; pani-1::mKate2::ANI-1; cb-unc-119(+)]IV | This study                  |
| ZAN267      | estSi178 [pEZ231; pmex-5::TPXL-1 <sup>FD</sup> ::mNeonGreen:: tbb-2; cb-unc-119(+)]II; unc-119(ed3) III                                                                                                                                                       | This study                  |
| ZAN286      | estSi71 [pAC257;pmex-5::LifeAct::mKate2:tbb2; cb-unc-119(+)]IV; rga-4(ok1935) unc-62(e644) rga-3(ok1988) V/nT1[qls51](IV;V)                                                                                                                                   | This study                  |

Table S2. Oligonucleotides used for dsRNA production

| Gene                           | Oligonucleotide 1 (5' to 3')                    | Oligonucleotide 2 (5' to 3')                    | Template    | dsRNA concentration |
|--------------------------------|-------------------------------------------------|-------------------------------------------------|-------------|---------------------|
| <i>tpxl-1</i>                  | <u>TAATACGACTCACTATAGGACGTCGGTGAGCAAATTGAC</u>  | <u>TAATACGACTCACTATAGGTTACACATATGATGGCACAGG</u> | cDNA        | 0.58 mg/ml          |
| <i>nmy-2</i>                   | <u>TAATACGACTCACTATAGGAATTGAATCTCGTTGAAGGAA</u> | <u>TAATACGACTCACTATAGGACTGCATTTACGCATCTTATG</u> | cDNA        | 0.36                |
| <i>hcp-4</i>                   | <u>TAATACGACTCACTATAGGGGAAATGTACGGAGCGAAAC</u>  | <u>TAATACGACTCACTATAGGGTTGGTGGTCCAATATTAC</u>   | cDNA        | 0.64                |
| <i>rga-3</i> ,<br><i>rga-4</i> | <u>TAATACGACTCACTATAGGGCAACCGCTCGAAACATCG</u>   | <u>TAATACGACTCACTATAGGGTTGGAGTGGCAGTTGGAGTG</u> | Genomic DNA | 2.9                 |

T7 sequences are underlined.

## References

- Frøkjær-Jensen, C., M.W. Davis, C.E. Hopkins, B.J. Newman, J.M. Thummel, S.-P. Olesen, M. Grunnet, and E.M. Jorgensen. 2008. Single-copy insertion of transgenes in *Caenorhabditis elegans*. *Nat. Genet.* 40:1375–1383. <https://doi.org/10.1038/ng.248>
- Hattersley, N., D. Cheerambathur, M. Moyle, M. Stefanutti, A. Richardson, K.-Y. Lee, J. Dumont, K. Oegema, and A. Desai. 2016. A nucleoporin docks protein phosphatase 1 to direct meiotic chromosome segregation and nuclear assembly. *Dev. Cell.* 38:463–477. <https://doi.org/10.1016/j.devcel.2016.08.006>
- Kim, T., P. Lara-Gonzalez, B. Prevo, F. Meitinger, D.K. Cheerambathur, K. Oegema, and A. Desai. 2017. Kinetochores accelerate or delay APC/C activation by directing Cdc20 to opposing fates. *Genes Dev.* 31:1089–1094. <https://doi.org/10.1101/gad.302067.117>
- Wang, S., D. Wu, S. Quintin, R.A. Green, D.K. Cheerambathur, S.D. Ochoa, A. Desai, and K. Oegema. 2015. NOCA-1 functions with  $\gamma$ -tubulin and in parallel to Patronin to assemble non-centrosomal microtubule arrays in *C. elegans*. *eLife.* 4:e08649. <https://doi.org/10.7554/eLife.08649>
- Woodruff, J.B., O. Wueseke, V. Viscardi, J. Mahamid, S.D. Ochoa, J. Bunkenborg, P.O. Widlund, A. Pozniakovsky, E. Zanin, S. Bahmanyar, et al. 2015. Centrosomes. Regulated assembly of a supramolecular centrosome scaffold in vitro. *Science.* 348:808–812. <https://doi.org/10.1126/science.aaa3923>
- Wueseke, O., D. Zwicker, A. Schwager, Y.L. Wong, K. Oegema, F. Jülicher, A.A. Hyman, and J.B. Woodruff. 2016. Polo-like kinase phosphorylation determines *Caenorhabditis elegans* centrosome size and density by biasing SPD-5 toward an assembly-competent conformation. *Biol. Open.* 5:1431–1440. <https://doi.org/10.1242/bio.020990>
- Zanin, E., A. Desai, I. Poser, Y. Toyoda, C. Andree, C. Moebius, M. Bickle, B. Conrad, A. Piekny, and K. Oegema. 2013. A conserved RhoGAP limits M phase contractility and coordinates with microtubule asters to confine RhoA during cytokinesis. *Dev. Cell.* 26:496–510. <https://doi.org/10.1016/j.devcel.2013.08.005>
